# Supplementary material
Source: PubMed Central journal article supplement (PMC3484651)
Supplement: mmc1.pdf [file mmc1.pdf]

## Supplemental Data

### A Noncoding, Regulatory Mutation Implicates *HCFC1* in Nonsyndromic Intellectual Disability

Lingli Huang, Lachlan A. Jolly, Saffron Willis-Owen, Alison Gardner, Raman Kumar, Evelyn Douglas, Cheryl Shoubridge, Dagmar Wiczorek, Andreas Tzschach, Monika Cohen, Anna Hackett, Michael Field, Guy Froyen, Hao Hu, Stefan A. Haas, Hans-Hilger Ropers, Vera M. Kalscheuer, Mark A. Corbett, and Jozef Gecz

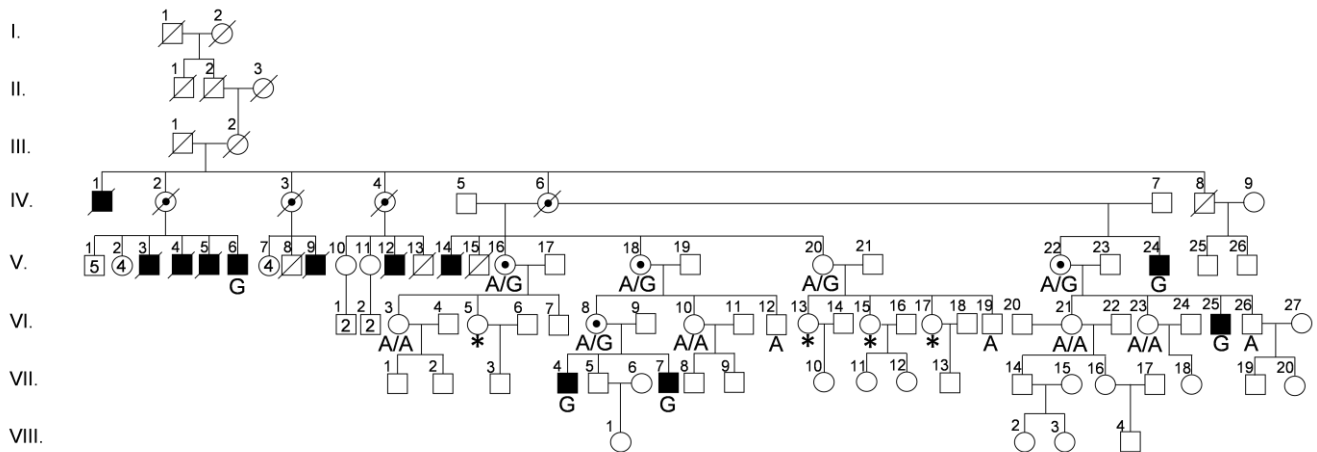

**Figure S1. Pedigree of the MRX3 Family**

Updated pedigree of the MRX3 family is shown. *HCFC1* chrX:152,890,455A>G (hg18) genotyped individuals are shown with either their genotype (A, A/A, G, or A/G) or an asterisk (\*), for those individuals, where the genotype is not disclosed (but was typed and segregated with their clinical status). Open circles show females; circles with a dot in the middle show obligate carrier females; empty squares show males, solid squares show affected males, crossed symbols show deceased individuals.

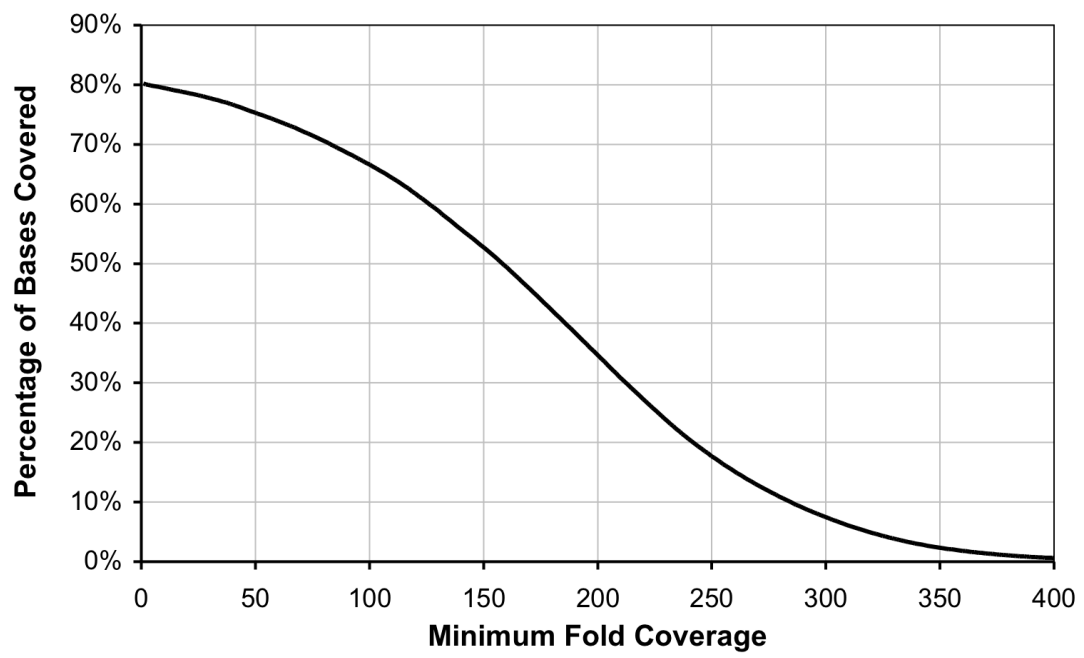

**Figure S2. Coverage Plot for All Bases Tiled on the Targeted Capture Array**

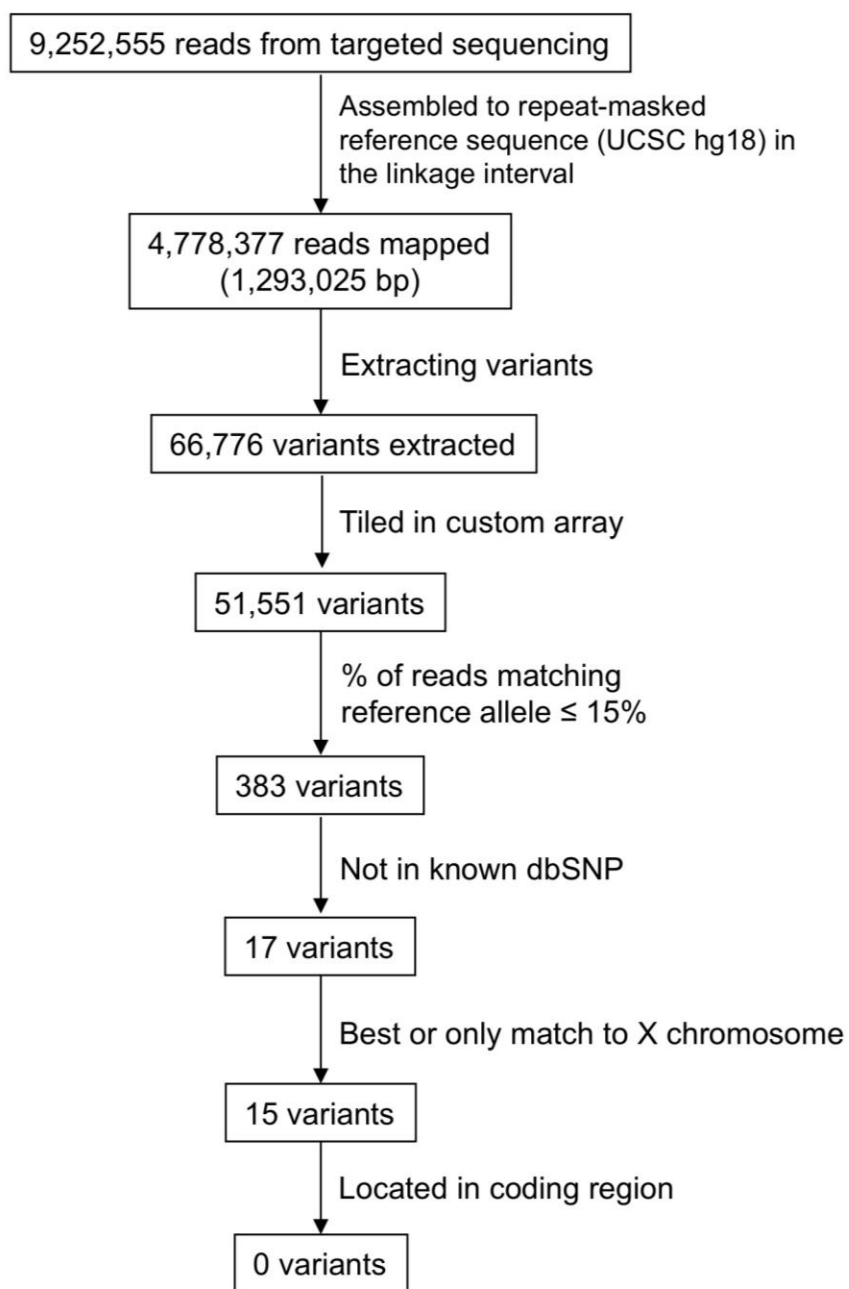

**Figure S3. Work Flow of Detecting and Prioritizing Variants**

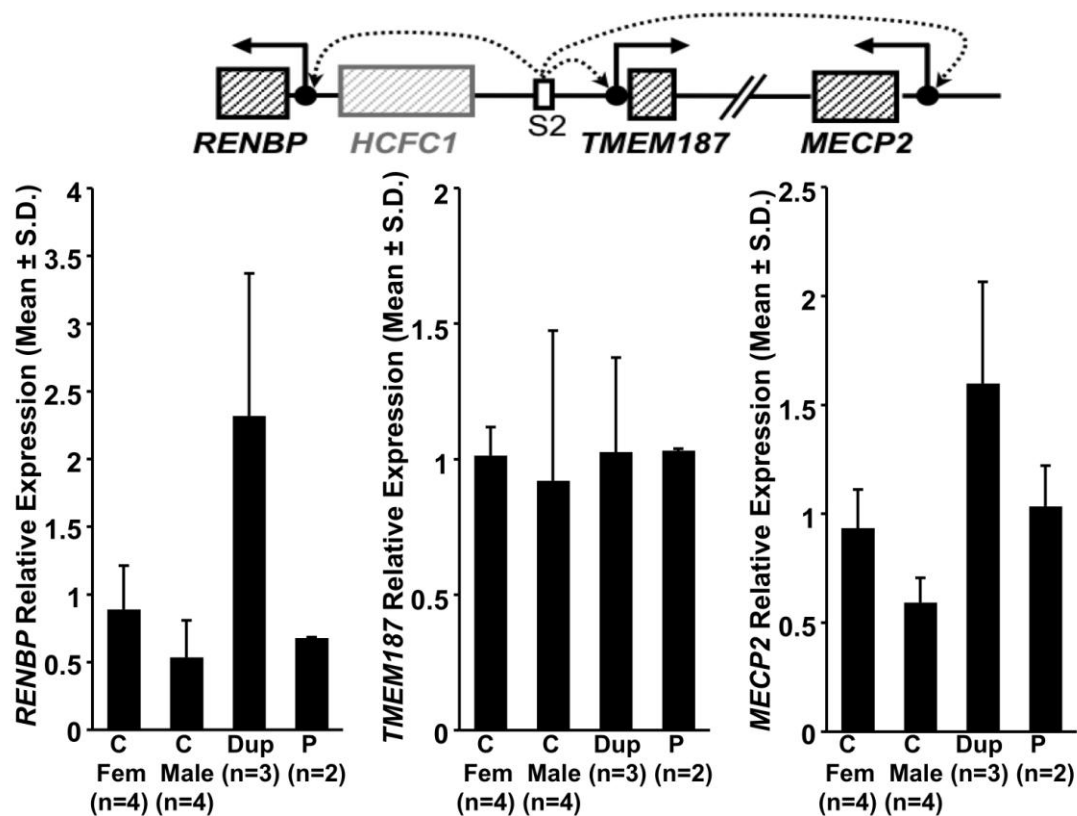

**Figure S4. Possible Effects of YY1 Binding Site S2 Mutation on *RENBP*, *TMEM187*, and *MECP2***

Upper panel, schematic diagram of the genomic structure of the *HCFC1* gene and possible responsive genes to the mutation in the YY1 binding site S2. Arrows with dashed lines represent the possible pattern of effects on the transcriptional activity of genes in the region. Lower panel, qRT-PCR showing the relative expression of *RENBP*, *TMEM187* and *MECP2* to  $\beta$ -actin expression in controls (females n = 4, C Fem; and males n = 4 C Male), *MECP2* gene duplications involving these genes (n = 3; Dup), and the MRX3 patients (n = 2; P). qRT-PCR was carried out as previously described (Nat. Genet. 39, 1127–1133, 2007), using primers listed in Table S4. Data was derived from three independent experiments. Graphs represent mean expression  $\pm$  SD.

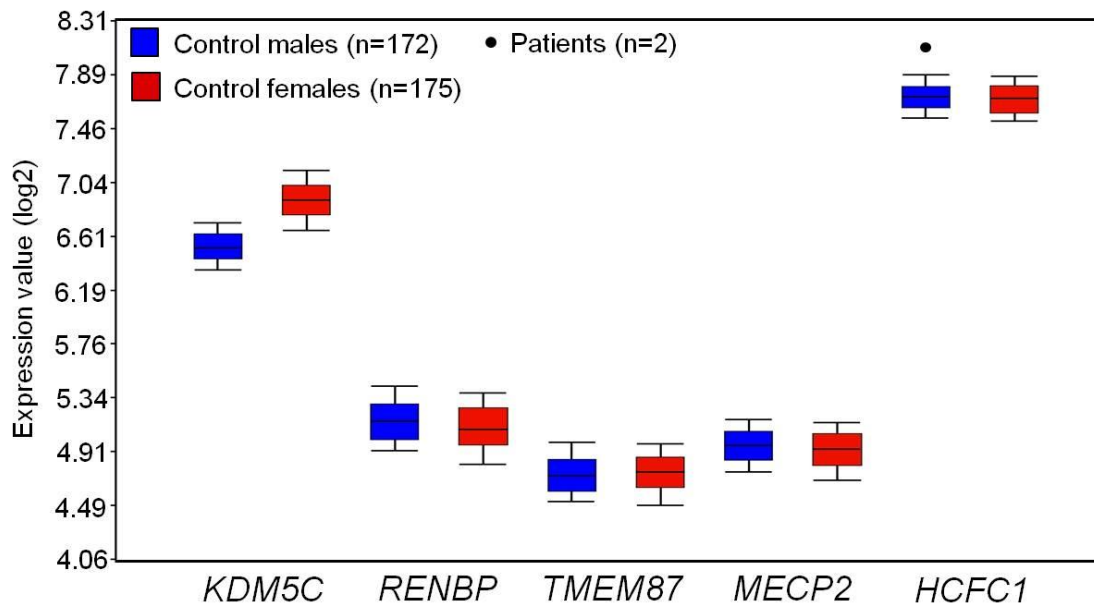

**Figure S5. Relative Expression of *KDM5C*, *REBP*, *TMEM87*, *MECP2*, and *HCFC1* of the Patients (n = 2) as Determined by qRT-PCR to Control Males (n = 192) and Females (n = 175) Measured by Microarray (GSE1485)**

Box plots illustrate the expression distribution in LCLs of normal males and females of *KDM5C*, which is known to escape X inactivation, and *REBP*, *TMEM87*, and *MECP2* that are known to be subjected to X inactivation. Expression of the patients (black dot near the *HCFC1* mRNA box plot) was determined as fold change by qRT-PCRs and converted into log<sub>2</sub> expression relative to the mean of the control group. Microarray analysis was carried out using Partek Genomic Suite V6.6 as previously described (Nature 430, 743-747, 2004). qRT-PCR was carried out using primers listed in Table S4.

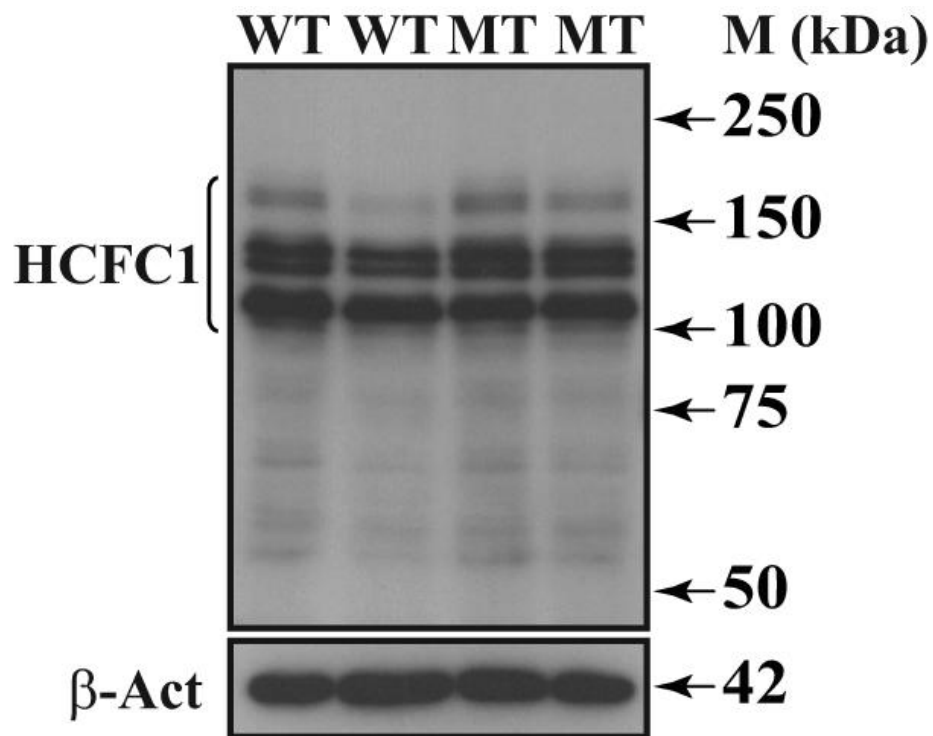

**Figure S6. Total Protein Lysates (12  $\mu$ g each) from Normal (WT; n = 2) and MRX3 (MT; n = 2) Male LCLs Were Immunoblotted According to Published Method (Mol Cancer Res. 4, 655-665, 2006) using a Rabbit Anti-HCFC1 Antibody (Cell 74, 115-125, 1993)**

HCFC1 protein is post-translationally processed into multiple species, which are shown on the left hand side of the blot. Anti- $\beta$ -actin antibody (Sigma) was used as a loading control (bottom panel).

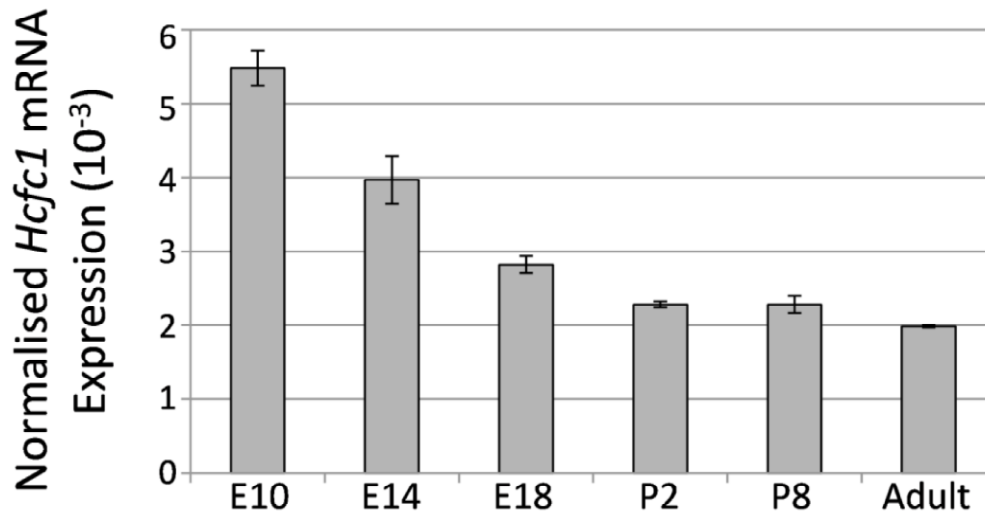

**Figure S7. *Hcfc1* Is Highly Expressed during Embryonic Brain Development**

qRT-PCR used to quantify *Hcfc1* mRNA at different stages of embryonic (E) and post-natal (P) stages of murine brain development.  $n \geq 4$  brains at each time point. qRT-PCR was carried out as previously described (Nat. Genet. 39, 1127–1133, 2007), using primers listed in Table S4 below. The embryonic expression profile is consistent with a role in proliferative cells – as these cells deplete through the generation of terminally differentiated cells so does *Hcfc1* expression. Expression during postnatal development, however suggests likely role in post-mitotic cells as well.

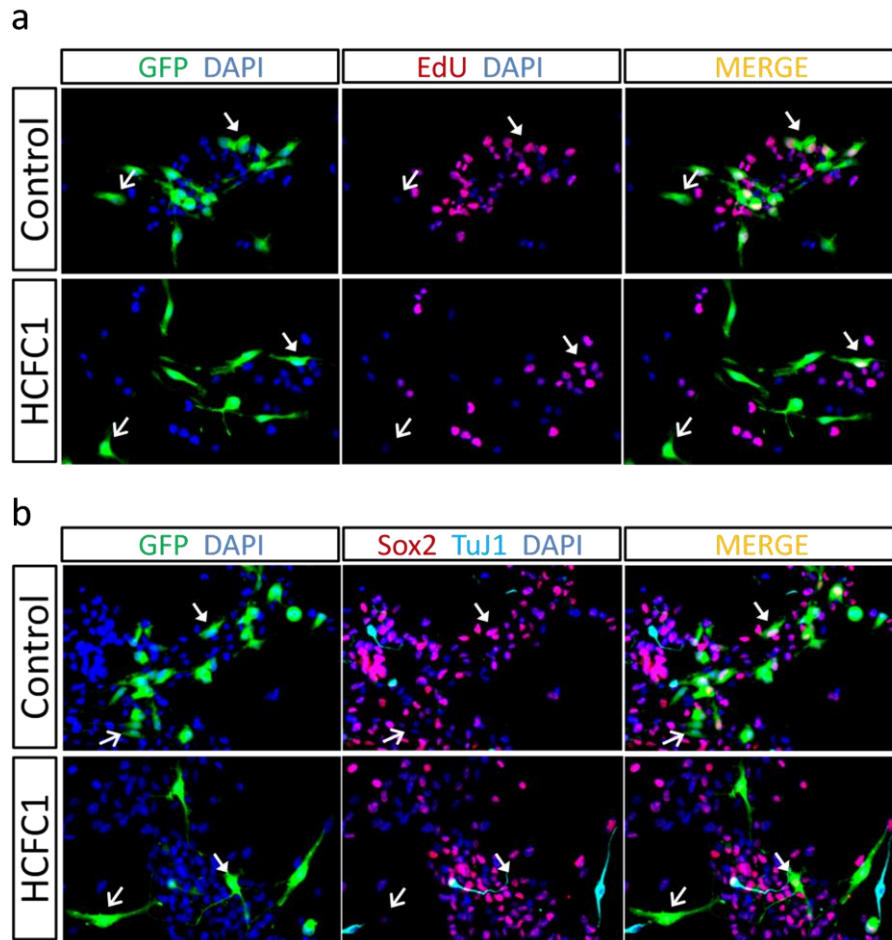

**Figure S8. *HCFC1* Overexpression Reduces Number of NSCs**

NSCs were isolated, grown and differentiated using described methods (Methods Mol Biol. 482, 143-158, 2009), and transfected via nucleofection as per manufactures instructions (Lonza). NSCs were transfected with plasmids expressing *GFP* (pMax-EGFP; Lonza) together with either an empty vector control (pcDNA3.1; Invitrogen) or *HCFC1* expression plasmid (pCGN-*HCFC1*). Transfected NSCs were grown for 3 days in adherent culture before analysis.

(A) Cells labelled for 12 hours with EdU. EdU labelling and detection was achieved using the Click-it EdU AlexaFluor647-Azide kit (Invitrogen). Representative immunofluorescent images identifying transfected cells via EGFP expression (green) and the presence of EdU incorporation (red). Nuclei are stained with DAPI (blue). Closed arrowheads indicate transfected cells labelled with EdU, open arrowheads indicate transfected cells not labelled with EdU.

(B) Representative immunofluorescent images of transfected cells (green) stained using antibodies against cell type specific marker proteins: NSCs (Sox2; red) and Neurons (TuJ1; cyan); Nuclei are stained with DAPI (blue). Closed arrowheads indicate transfected cells expressing Sox2, open arrowheads indicate transfected cells that do not. Note that cells over-expressing *HCFC1* are less likely to be labelled with EdU, and also less likely to co-express Sox2 compared to controls. All staining and microscopy carried out as previously described (Mol. Biol. Cell. 20, 2015-2029, 2009).



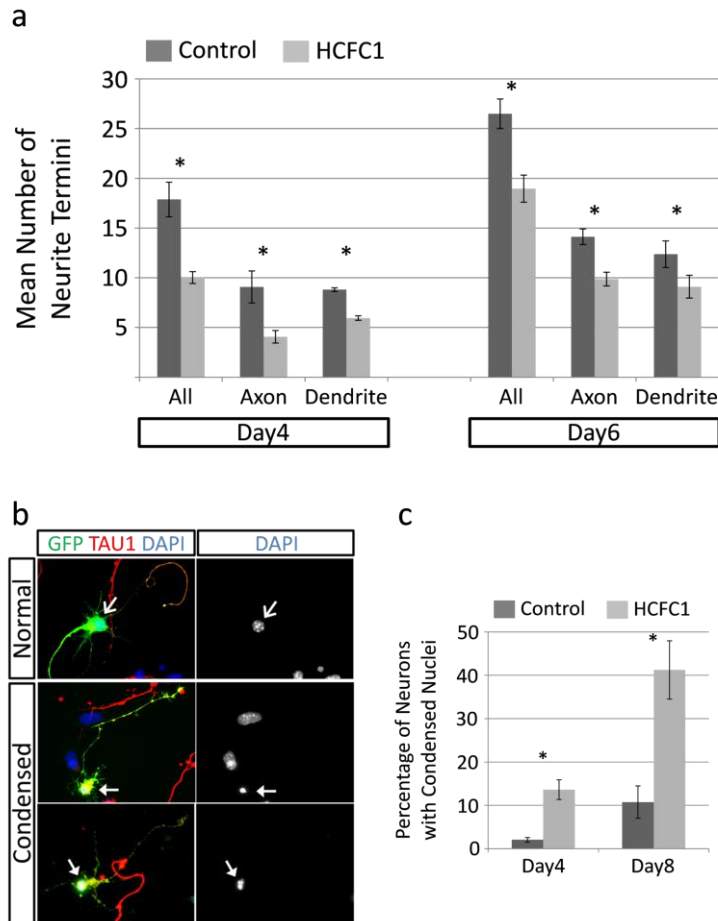

**Figure S9. *HCFC1* Overexpression Reduces Hippocampal Neuronal Arborisation and Increases Neurotoxicity**

Primary hippocampal neurons were isolated, transfected and grown as previously described (Am. J. Hum. Genet. 87, 371-375, 2005). Neurons were transfected with plasmids expressing *GFP* (pMax-EGFP; Lonza) together with either an empty vector control (pcDNA3.1; Invitrogen) or a *HCFC1* expression plasmid (pCGN-*HCFC1*).

(A) *HCFC1* over-expression reduces hippocampal outgrowth. Transfected cells were identified using *GFP* expression, and axons and dendrites were identified using immunoreactivity to *TAU1* and *MAP2* antibodies respectively, as previously described (Am. J. Hum. Genet. 87, 371-375, 2010). Average number of neurite termini identified at days 4 and 8 of differentiation determined as previously described (Am. J. Hum. Genet. 87, 371-375, 2010). At least 25 neurons scored per experiment done in triplicate.

(B and C) *HCFC1* overexpression is neurotoxic.

(A) Representative immunofluorescent images used to score neurons undergoing cell death. Transfected neurons identified using *GFP* expression, and *TAU1* immunoreactivity. Neurons, which displayed nuclei with overt signs of condensation and fragmentation (closed arrowheads), were scored as dying, whilst neurons with normal nuclei (open arrowheads) were not. Note that dying neurons commonly displayed other morphological differences including blebbing membranes and vesicular inclusions. At least 300 neurons scored per experiment conducted in triplicate. All graphs represent the mean of triplicate experiments +/- SD. \* $p < 0.05$  by 2-tailed Student's *t*-test.

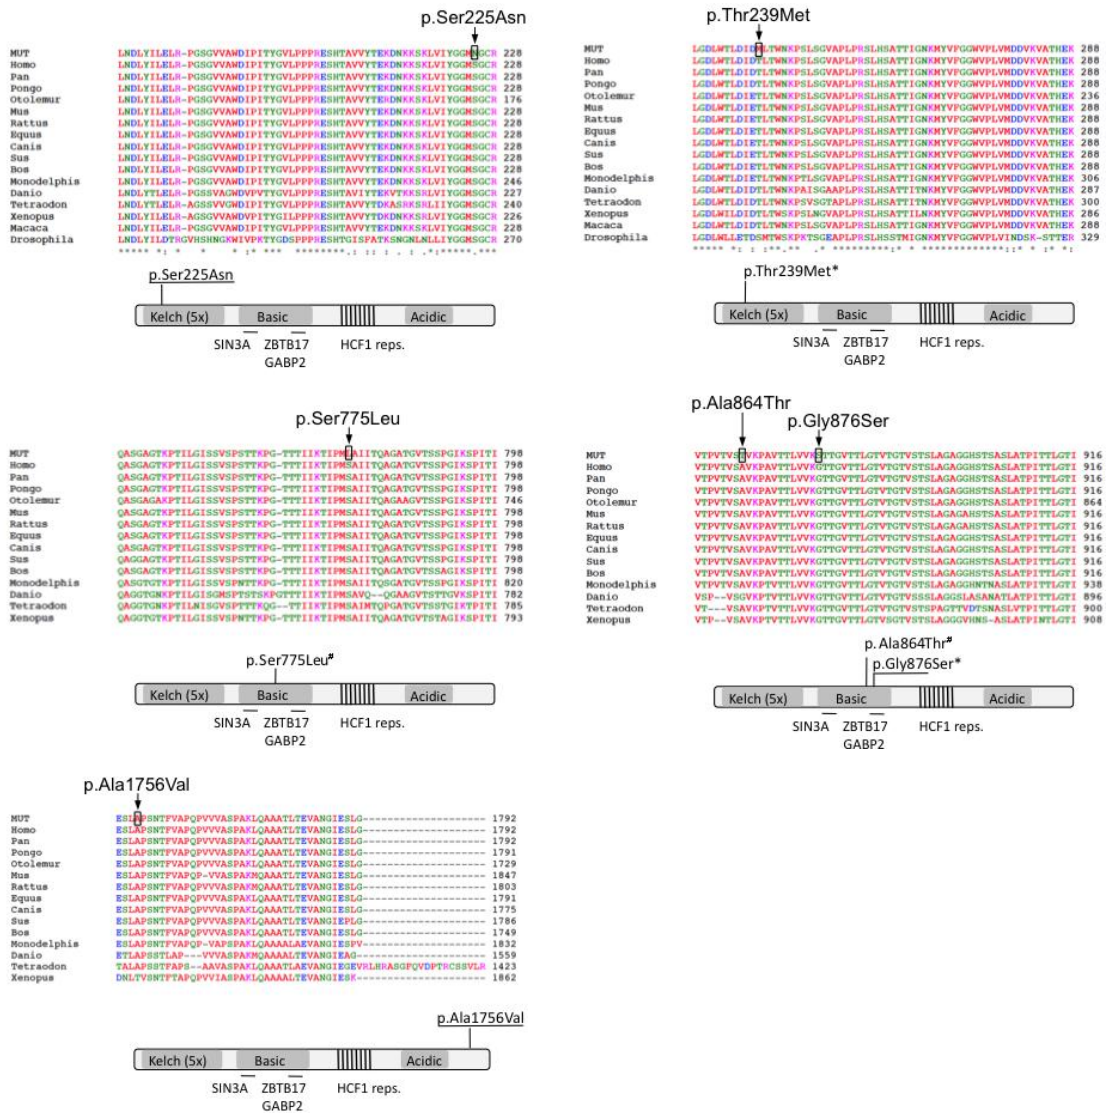

**Figure S10. ClustalW Multiple Protein Alignment of Selected *HCFC1* Orthologs**

ClustalW alignment has been performed at <http://www.ebi.ac.uk/>. The “MUT” sequence on top of each alignment indicates the mutant *HCFC1* protein with that specific amino acid highlighted by a box and variant annotation. At the bottom of each panel there is a schematic of *HCFC1* protein (similar to that shown in Figure 2E) showing the position of that specific amino acid within the *HCFC1* protein. The underlined amino acid changes indicated those found as part of this study. The asterisk (\*) indicate those also found by Piton et al. (*Mol. Psychiatry* 16, 867-880, 2011) and the hash (#) indicates those found by Tarpey et al. (*Nat. Genet.* 41, 535-543, 2009).

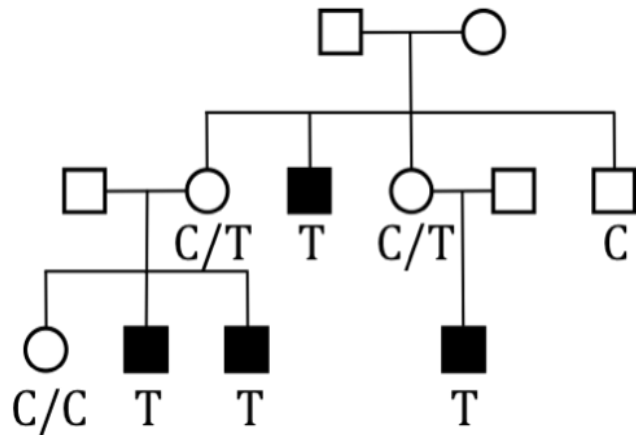

**Figure S11. Pedigree of Family D144**

The segregation of the *HCFC1* change (hg18) chrX:152881908C>T; p.Ser225Asn is shown. “C” refers to the wild type allele and “T” to the mutant allele.

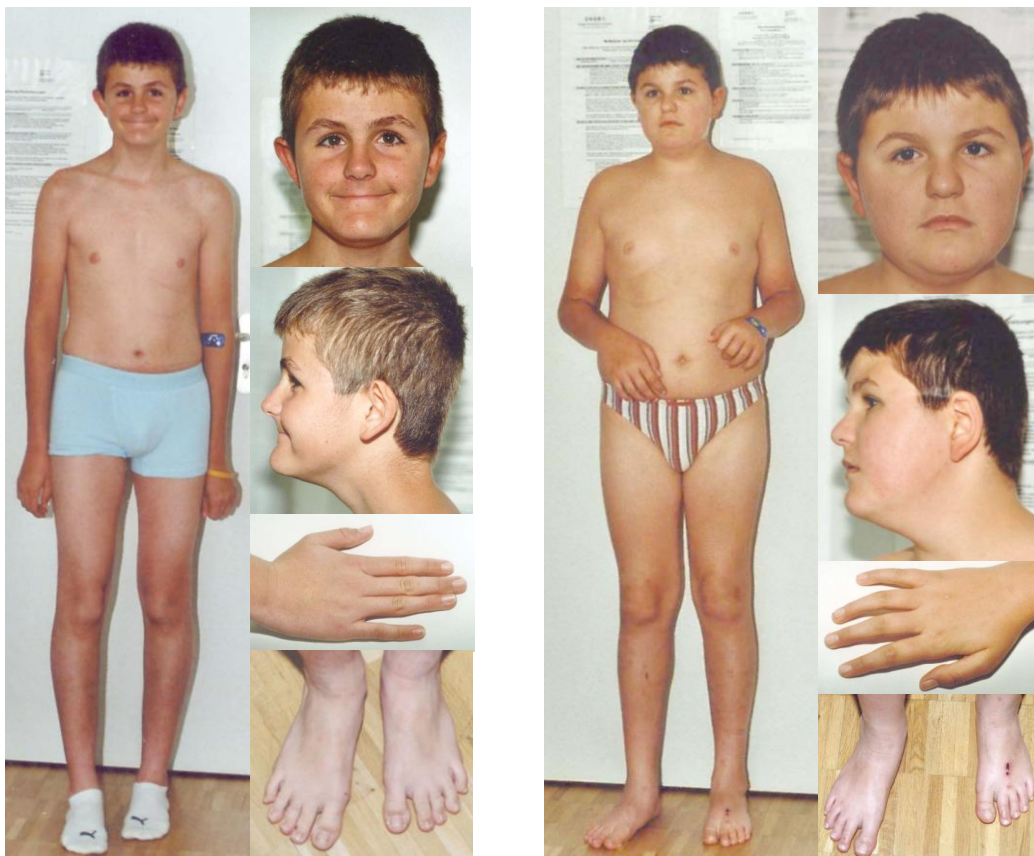

**Figure S12. Patients from the D144 Family**

**Table S1. Statistics of the Data from Targeted Sequencing**

|                        | Total Tiled   | Tiled and Covered          | Tiled not Covered   |                               |                                   |
|------------------------|---------------|----------------------------|---------------------|-------------------------------|-----------------------------------|
| <b>Bases (nt)</b>      |               |                            |                     |                               |                                   |
| Total                  | 941,355       | 755,814                    | 185,541             |                               |                                   |
| Repeat-Masked          | 179,194       | 978                        | 178,216             |                               |                                   |
| Not Repeat-Masked      | 762,161       | 754,836                    | 7,325               |                               |                                   |
| <b>Percentage</b>      |               |                            |                     |                               |                                   |
| Total                  | 100%          | <b>80.29%</b> <sup>1</sup> | 19.17% <sup>1</sup> |                               |                                   |
| Repeat-Masked          | 19.04%        | 0.13%                      | <b>96.05%</b>       |                               |                                   |
| Not Repeat-Masked      | 80.96%        | <b>99.87%</b>              | 3.95%               |                               |                                   |
| <b>GC Content</b>      |               |                            |                     |                               |                                   |
| Total                  | 51.69%        | 53.20%                     | 45.58%              |                               |                                   |
| Repeat-Masked          | 44.80%        | 46.88%                     | 44.79%              |                               |                                   |
| Not Repeat-Masked      | 53.31%        | 53.20%                     | <b>64.28%</b>       | <b>Amplified</b> <sup>2</sup> | <b>Not Amplified</b> <sup>2</sup> |
| <b>CCDS (nt)</b>       |               |                            |                     |                               |                                   |
| Total                  | 114,762       | 113,418                    | 1,344               | 988                           | 356                               |
| Repeat-Masked          | 965           | 161                        | 804                 | 669                           | 135                               |
| Not Repeat-Masked      | 113,797       | 113,257                    | 540                 | 319                           | 221                               |
| <b>CCDS Percentage</b> |               |                            |                     |                               |                                   |
| Total                  | 100%          | <b>98.83%</b> <sup>1</sup> | 1.17% <sup>1</sup>  | 100%                          | 100%                              |
| Repeat-Masked          | 0.84%         | 0.14%                      | 59.82%              | 67.71%                        | 37.92%                            |
| Not Repeat-Masked      | <b>99.16%</b> | <b>99.86%</b>              | 40.18%              | 32.29%                        | 62.08%                            |

<sup>1</sup> The total percentage would be 100% when calculating the percentage of Repeat-Masked and Not Repeat-Masked items in total items.

<sup>2</sup> Amplified by Sanger exon-sequencing (Nat. Genet. 41, 535-543, 2009) or not.

**Table S2. Overview of Coding Regions Not Covered by Sequence Reads**

| Chromosome   | chr_Start <sup>1</sup> | chr_End <sup>1</sup> | Span (bp) | Repeats (bp) | Unique Bases | Gene                      | Location  | GC_Content | Sequence Characters  |
|--------------|------------------------|----------------------|-----------|--------------|--------------|---------------------------|-----------|------------|----------------------|
| chrX         | 149612662              | 149612807            | 146       | 98           | 48           | MTMR1                     | Exon1     | 84.93%     | Repeats              |
| chrX         | 152607224              | 152607266            | 43        | 0            | 43           | SLC6A8 (known XLID genes) | Exon1     | 58.14%     | Flanked with repeats |
| chrX         | 152853933              | 152853988            | 56        | 37           | 19           | RENBP                     | Last exon | 83.93%     | Repeats              |
| chrX         | 153325777              | 153325887            | 111       | 0            | 111          | FAM50A                    | Exon1     | 64.86%     | Flanked with repeats |
| <b>Total</b> |                        |                      | 356       | 135          | 221          |                           |           |            |                      |

<sup>1</sup> 1 bp positions based on UCSC hg18 March 2006 genome build

**Table S3. Overview of All Sequenced Variants in Custom Array but Not in dbSNP**

| Position on chrX (hg18) | Coverage        | % Variant Allele   | Sequence Variant <sup>1</sup> | Locations                                                 | Gene or Closest Gene | Alternative Allele in Other Species <sup>2</sup>       |
|-------------------------|-----------------|--------------------|-------------------------------|-----------------------------------------------------------|----------------------|--------------------------------------------------------|
| 149676594               | 281             | 98.9%              | A/G                           | Intronic                                                  | <i>MTMR1</i>         | <b>A (13)<sup>3</sup></b> , G (1), - <sup>4</sup> (30) |
| 149681465               | 170             | 95.9%              | C/T                           | Intronic                                                  | <i>MTMR1</i>         | <b>C (10)</b> , G (1), - (33)                          |
| 149688488               | 242             | 96.3%              | G/A                           | Intronic                                                  | <i>CD99L2</i>        | <b>G (12)</b> , A (8), C (1), - (23)                   |
| 149714813               | 237             | 99.6%              | T/C                           | Intronic                                                  | <i>CD99L2</i>        | <b>T (20)</b> , C (3), - (21)                          |
| 149726254               | 147             | 98.0%              | G/A                           | Intronic                                                  | <i>CD99L2</i>        | <b>G (7)</b> , A (1), - (36)                           |
| 149818442               | 67              | 98.5%              | C/G                           | Intergenic (between <i>CD99L2</i> and <i>HMGB3</i> )      | <i>CD99L2</i>        | <b>C (4)</b> , G (14), T (1), - (26)                   |
| 149819749               | 331             | 96.7%              | T/-                           | Intergenic (between <i>CD99L2</i> and <i>HMGB3</i> )      | <i>CD99L2</i>        | <b>T (14)</b> , A (2), C (1), - (27)                   |
| 152421658               | 90              | 96.7%              | C/T                           | Intronic                                                  | <i>BGN</i>           | <b>C (11)</b> , T (2), G (1), A (1), - (29)            |
| 152426100               | 159             | 94.3%              | A/G                           | Intronic                                                  | <i>BGN</i>           | <b>A (8)</b> , G (4), C (1), - (31)                    |
| 152453830               | 187             | 93.6%              | G/T                           | Intergenic region (between <i>ATP2B3</i> and <i>BGN</i> ) | <i>ATP2B3</i>        | <b>G (13)</b> , A (3), C (2), -                        |
| 152569224               | 67              | 94.0%              | G/A                           | 3'UTR                                                     | <i>DUSP9</i>         | <b>G (15)</b> , - (29)                                 |
| 152683343               | 122             | 90.2%              | C/-                           | Intronic                                                  | <i>KIAA1206</i>      | <b>C (6)</b> , A (5), G (6), T (1), - (26)             |
| 152863377 <sup>4</sup>  | 22 <sup>4</sup> | 86.4% <sup>4</sup> | -/G <sup>4</sup>              | 5'UTR                                                     | <i>RENBP</i>         |                                                        |
| 152890455               | 102             | 99.0%              | A/G                           | Intergenic (between <i>HCFC1</i> and <i>TMEM187</i> )     | <i>HCFC1</i>         | <b>A (31)</b> , - (13)                                 |
| 153960377               | 14              | 92.9%              | A/G                           | Intronic                                                  | <i>BRCC3</i>         | <b>A (17)</b> , G (1), - (26)                          |

<sup>1</sup> All variants are based on positive strands.

<sup>2</sup> Alternative alleles in all available vertebrates were based on the data from UCSC conversation track

<sup>3</sup> Numbers in bracket are counted species with the allele. '-' represents noninformative allele in the species.

<sup>4</sup> The position chrX: 152863377 '-/G' is a complex variant.

**Table S4. List of Primers Used in This Study for Sequencing and qPCR**

| Primer Name              | F/R | Sequence (5' to 3')     | Size (bp) | Location   | Product Sizes |
|--------------------------|-----|-------------------------|-----------|------------|---------------|
| <i>HCFC1</i> Total       | F   | GGCAACGAGGGGAATAGTGGAC  | 21        | Exon 1     | 73 bp         |
|                          | R   | TCACGGCTGGGATGAACC      | 18        | Exon 2     |               |
| <i>HCFC1</i> S2 Specific | F   | GCTTCTTCTGCCGTACAGTTGC  | 22        | Intergenic | 91 bp         |
|                          | R   | CTCACTTCCC GCCTTATGACTC | 22        | Intergenic |               |
| <i>RENBP</i>             | F   | TGCGCCTCTTCTACCAAGTG    | 20        | Exon 9     | 82 bp         |
|                          | R   | CTCAGGTAGCCAAACCATTCC   | 21        | Exon 10    |               |
| <i>TMEM187</i>           | F   | AGGCGAGTGAGGCGAAATAC    | 20        | Exon 1     | 232 bp        |
|                          | R   | GAGAGCAGCCTTCAATACGC    | 20        | Exon 2     |               |
| <i>MECP2</i>             | F   | GCTTTTCCCTGGGGATTGA     | 19        | Exon 3     | 120 bp        |
|                          | R   | GGGACCCATGTATGATGACC    | 20        | Exon 3     |               |
| <i>Hcfc1</i>             | F   | GCAACGAGGGGATAGTGGAC    | 20        | Exon 1     | 74 bp         |
|                          | R   | TCTCACAGCTGGGATGAACC    | 20        | Exon 2     |               |
| <i>HCFC1</i> Sequencing  | F   | TACGGCAGAAGAAGCGGTA     | 20        | intergenic | 199 bp        |
|                          | R   | GGGTCCTTTAAGAGGCTTGG    | 21        | Intergenic |               |

**RNA isolation, reverse transcription reactions and qPCR reactions were performed as previously described (Nat. Genet. 39, 1127–1133, 2007).**

**Table S5. List of Oligonucleotides Used in Electrophoretic Mobility Shift Assays**

| Binding Site     | Genomic Location                 | Sequence (5'-3')                     |
|------------------|----------------------------------|--------------------------------------|
| YY1<br>Consensus | N/A                              | CGCTCCCCGGCCATCTTGGCGGCTGGT          |
| S2               | chrX:152,890,443-<br>152,890,469 | CTGGGAGCCGCCATCTTGTGTGAAGAA          |
| mS2              | chrX:152,890,443-<br>152,890,469 | CTGGGAGCCGCC <b>g</b> TCTTGTGTGAAGAA |

Oligonucleotides matching the YY1 consensus binding site (sc-2533, Santa Cruz Biotech), the S2 binding site in *HCFC1* (152,890,443-152,890,469), or the variant mS2 binding site of affected individuals in the MRX3 family. Variant nucleotide is in lowercase bold font in mS2.

**Table S6. Primers for ChIP-PCR Amplifications**

| Target Region | F/R | Sequence (5' to 3')         | Size (bp) |
|---------------|-----|-----------------------------|-----------|
| S2            | F   | TACGGCAGAAGAAGCGGTAAC       | 199       |
|               | R   | GGGTCCTTTAAGAGGCTTGG        |           |
| S6            | F   | TCGTCTAAGGCAGCTCTCACGGAGAAG | 169       |
|               | R   | GCTTCTTGAGCCTAGGCGCTCGACAGT |           |
| -C            | F   | AACTTTCCCCAGTTCAGTGC        | 103       |
|               | R   | TGGGAACGACTTAGCATGAG        |           |

PCR amplifications were performed using the KAPA HiFi PCR Kit (Kapa Biosystems) under the following conditions: S2 and S6: 98 °C for 3 min; 31 cycles of 98 °C for 15 s, 66 °C for 15 s, and 72 °C for 30 s and *HUWE1* negative control: 98 °C for 3 min; 31 cycles of 98 °C for 15 s, 60 °C for 15 s, and 72 °C for 30 s.

**Table S7. List of Primers for the PCR Amplification of Genomic DNA Fragments Used in Luciferase Reporter Constructs**

| <b>Genomic fragments</b> | <b>F/R</b> | <b>Sequence (5' to 3')</b>                            | <b>Size (bp)</b> | <b>Retriiction enzyme</b> |
|--------------------------|------------|-------------------------------------------------------|------------------|---------------------------|
| 1 205 bp                 | F          | GG <b>gctagc</b> AGTCTCATCCGGGCAT<br>TTC <sup>a</sup> | 27               | <i>NheI</i>               |
|                          | R          | CGGAGAA <b>aagctt</b> TCTCACACAGCG<br>GTAGACG         | 31               | <i>HindIII</i>            |
| 705 bp                   | F          | GG <b>gctagc</b> AGTCTCATCCGGGCAT<br>TTC              | 27               | <i>NheI</i>               |
|                          | R          | GG <b>Caagctt</b> CGTACGGCTTGTGAA<br>GTCTCG           | 30               | <i>HindIII</i>            |
| R-705 bp                 | F          | CTGAGC <b>aagctt</b> GCAGTCTCATCCG<br>GGCATTTC        | 33               | <i>HindIII</i>            |
|                          | R          | AGGGGGC <b>gctagc</b> CGTACGGCTTG<br>TGAAGTC          | 31               | <i>NheI</i>               |

<sup>a</sup>Bold lowercase indicates the restriction enzyme site.

**Table S8. Functional Annotation of 218 Differentially Expressed Genes**

| Category             | Term                                                                     | Count | %    | Fold Enrichment | P-Value  | Benjamini |
|----------------------|--------------------------------------------------------------------------|-------|------|-----------------|----------|-----------|
| SP_PIR_KEYWORDS      | acetylation                                                              | 46    | 23.3 | 1.6             | 8.10E-05 | 2.10E-02  |
| SP_PIR_KEYWORDS      | mitochondrion                                                            | 24    | 19.2 | 2.5             | 3.60E-04 | 4.70E-02  |
| UCSC_TBBS            | NCX                                                                      | 100   | 48.2 | 1.3             | 4.00E-04 | 6.70E-02  |
| GOTERM_BP_FAT        | regulation of synaptic transmission, GABAergic                           | 4     | 1.9  | 21.5            | 7.60E-04 | 6.60E-01  |
| GOTERM_BP_FAT        | intracellular transport                                                  | 18    | 8.7  | 2.5             | 7.80E-04 | 4.20E-01  |
| INTERPRO             | Cytosolic phosphate-dependent transferase, major region, subdomain 1     | 5     | 2.4  | 11.2            | 1.00E-03 | 3.60E-01  |
| GOTERM_CC_FAT        | mitochondrion                                                            | 24    | 11.7 | 2               | 1.20E-03 | 2.60E-01  |
| GOTERM_MF_FAT        | poly(U)RNA binding                                                       | 3     | 1.5  | 43              | 1.90E-03 | 5.20E-01  |
| UCSC_TBBS            | GATA2                                                                    | 77    | 37.4 | 1.3             | 2.40E-03 | 1.90E-01  |
| INTERPRO             | Aminotransferase, class V/Cysteine desulfurase                           | 3     | 1.5  | 39.2            | 2.40E-03 | 4.10E-01  |
| UCSC_TBBS            | SRF                                                                      | 72    | 35   | 1.4             | 3.10E-03 | 1.00E-01  |
| GOTERM_BP_FAT        | translation                                                              | 11    | 5.3  | 3               | 3.30E-03 | 7.90E-01  |
| UP_SEQ_FEATURE       | transit peptide Mitochondrion                                            | 13    | 6.3  | 2.7             | 3.40E-03 | 9.00E-01  |
| GOTERM_MF_FAT        | vitamin B6 binding                                                       | 5     | 2.4  | 8               | 3.50E-03 | 4.60E-01  |
| GOTERM_MF_FAT        | pyridoxal phosphate binding                                              | 5     | 2.4  | 8               | 3.50E-03 | 4.60E-01  |
| GOTERM_MF_FAT        | poly(ADP-ribose) tract binding                                           | 3     | 1.5  | 32.2            | 3.50E-03 | 3.00E-01  |
| BLOCKS               | IP004839                                                                 | 3     | 1.5  | 32.4            | 3.50E-03 | 4.00E-01  |
| OMM_DISEASE          | Multiple Genetic Loci for Bone Mineral Density and Fractures             | 3     | 1.5  | 31.4            | 3.60E-03 | 2.00E-01  |
| SP_PIR_KEYWORDS      | pyridoxal phosphate                                                      | 5     | 2.4  | 7.8             | 3.70E-03 | 2.90E-01  |
| GOTERM_BP_FAT        | transit peptide                                                          | 13    | 6.3  | 2.7             | 3.80E-03 | 2.20E-01  |
| GOTERM_MF_FAT        | vitamin binding                                                          | 7     | 3.4  | 4.8             | 4.00E-03 | 3.10E-01  |
| SP_PIR_KEYWORDS      | transferrin                                                              | 26    | 12.6 | 1.8             | 4.40E-03 | 2.10E-01  |
| GOTERM_MF_FAT        | aminopeptidase activity                                                  | 4     | 1.9  | 11.5            | 4.90E-03 | 3.10E-01  |
| GOTERM_MF_FAT        | transferase activity, transferring nitrogenous groups                    | 4     | 1.9  | 11.2            | 4.90E-03 | 3.10E-01  |
| GOTERM_BP_FAT        | phospholipid metabolic process                                           | 4     | 1.9  | 3.6             | 5.00E-03 | 9.30E-01  |
| GOTERM_BP_FAT        | nucleocytoplasmic transport                                              | 7     | 3.4  | 4.1             | 7.10E-03 | 8.70E-01  |
| SP_PIR_KEYWORDS      | alternative splicing                                                     | 95    | 46.1 | 1.2             | 7.20E-03 | 2.80E-01  |
| SP_PIR_KEYWORDS      | cytoplasm                                                                | 46    | 23.8 | 1.4             | 7.40E-03 | 2.50E-01  |
| GOTERM_BP_FAT        | nuclear transport                                                        | 7     | 3.4  | 4               | 7.50E-03 | 8.30E-01  |
| UP_SEQ_FEATURE       | splice variant                                                           | 95    | 46   | 1.2             | 7.70E-03 | 9.30E-01  |
| GOTERM_BP_FAT        | intracellular protein transport                                          | 11    | 5.3  | 2.7             | 7.70E-03 | 7.90E-01  |
| UCSC_TBBS            | FOXO4                                                                    | 110   | 53.4 | 1.2             | 8.90E-03 | 3.30E-01  |
| UCSC_TBBS            | AHRARNT                                                                  | 107   | 51.9 | 1.2             | 9.30E-03 | 2.80E-01  |
| SP_PIR_KEYWORDS      | rna binding                                                              | 13    | 6.3  | 2.3             | 9.80E-03 | 2.90E-01  |
| GOTERM_BP_FAT        | transmembrane complex subunit organization                               | 16    | 7.8  | 2.1             | 1.00E-02 | 8.40E-01  |
| GOTERM_MF_FAT        | proteolysis activity                                                     | 5     | 2.4  | 5.6             | 1.20E-02 | 5.40E-01  |
| GOTERM_BP_FAT        | polysaccharide biosynthetic process                                      | 4     | 1.9  | 8.1             | 1.30E-02 | 8.70E-01  |
| REACTOME_INTERACTION | vesicle-associated membrane protein 8 (endobrevin)                       | 3     | 1.5  | 18.1            | 1.30E-02 | 1.00E+00  |
| GOTERM_CC_FAT        | cytosol                                                                  | 24    | 11.7 | 1.7             | 1.40E-02 | 7.00E-01  |
| GOTERM_BP_FAT        | soluble protein localization                                             | 11    | 5.3  | 2.4             | 1.40E-02 | 8.40E-01  |
| GOTERM_CC_FAT        | Solgi apparatus part                                                     | 6     | 4.4  | 2.8             | 1.40E-02 | 8.30E-01  |
| GOTERM_BP_FAT        | Solgi vesicle transport                                                  | 6     | 2.9  | 4.2             | 1.40E-02 | 8.70E-01  |
| INTERPRO             | Aminotransferase, class I and II                                         | 3     | 1.5  | 16.2            | 1.40E-02 | 8.80E-01  |
| GOTERM_CC_FAT        | transmembrane part                                                       | 35    | 17   | 1.5             | 1.50E-02 | 4.70E-01  |
| GOTERM_BP_FAT        | soluble macromolecule localization                                       | 11    | 5.3  | 2.4             | 1.50E-02 | 8.30E-01  |
| GOTERM_CC_FAT        | Solgi membrane                                                           | 7     | 3.4  | 3.5             | 1.50E-02 | 5.30E-01  |
| GOTERM_MF_FAT        | nucleocytoplasmic transferase activity                                   | 6     | 2.9  | 4.1             | 1.50E-02 | 5.60E-01  |
| GOTERM_CC_FAT        | mitochondrial biosome                                                    | 4     | 1.9  | 7.1             | 1.50E-02 | 8.10E-01  |
| GOTERM_CC_FAT        | granular biosome                                                         | 4     | 1.9  | 7.7             | 1.50E-02 | 6.10E-01  |
| UCSC_TBBS            | GATA1                                                                    | 156   | 75.7 | 1.1             | 1.70E-02 | 4.00E-01  |
| UCSC_TBBS            | IST1                                                                     | 90    | 43.7 | 1.2             | 1.70E-02 | 3.50E-01  |
| GOTERM_BP_FAT        | immune response                                                          | 15    | 7.3  | 2               | 1.80E-02 | 8.60E-01  |
| REACTOME_INTERACTION | vesicle-associated membrane protein 7                                    | 3     | 1.5  | 13.7            | 1.80E-02 | 1.00E+00  |
| UCSC_TBBS            | SRF                                                                      | 137   | 65.5 | 1.1             | 2.10E-02 | 3.70E-01  |
| SP_PIR_KEYWORDS      | disease mutation                                                         | 26    | 12.6 | 1.6             | 2.10E-02 | 4.40E-01  |
| SP_PIR_KEYWORDS      | Acyltransferase                                                          | 6     | 2.9  | 3.8             | 2.10E-02 | 4.70E-01  |
| UP_SEQ_FEATURE       | transmembrane coiled-coil homology                                       | 3     | 1.5  | 13.2            | 2.10E-02 | 9.90E-01  |
| UCSC_TBBS            | CDPCP1                                                                   | 80    | 38.8 | 1.2             | 2.20E-02 | 3.60E-01  |
| GOTERM_BP_FAT        | protein complex biogenesis                                               | 12    | 5.8  | 2.2             | 2.20E-02 | 8.80E-01  |
| GOTERM_BP_FAT        | protein complex assembly                                                 | 12    | 5.8  | 2.2             | 2.20E-02 | 8.80E-01  |
| GOTERM_BP_FAT        | peroxisome localization                                                  | 2     | 1    | 61.4            | 2.20E-02 | 8.80E-01  |
| GOTERM_BP_FAT        | microtubule-based peroxisome localization                                | 2     | 1    | 61.4            | 2.20E-02 | 8.80E-01  |
| BIND                 | 5'-3' exonuclease 2                                                      | 3     | 1.5  | 12.3            | 2.30E-02 | 1.00E+00  |
| UCSC_TBBS            | HTF                                                                      | 106   | 51.5 | 1.2             | 2.50E-02 | 3.60E-01  |
| SP_PIR_KEYWORDS      | ribonucleoprotein                                                        | 8     | 3.9  | 2.8             | 2.50E-02 | 4.60E-01  |
| MINT                 | 802158 tumor necrosis factor receptor superfamily, member 1A             | 5     | 2.4  | 4.4             | 2.50E-02 | 1.00E+00  |
| GOTERM_BP_FAT        | post-Solgi vesicle-mediated transport                                    | 4     | 1.9  | 6.3             | 2.50E-02 | 8.90E-01  |
| GOTERM_CC_FAT        | mitochondrial part                                                       | 13    | 6.3  | 2               | 2.60E-02 | 6.10E-01  |
| GOTERM_BP_FAT        | aminoacyl-tRNA biosynthetic process                                      | 3     | 1.5  | 11.8            | 2.60E-02 | 8.80E-01  |
| SP_PIR_KEYWORDS      | shps3oprotein                                                            | 86    | 43.2 | 1.2             | 2.70E-02 | 4.60E-01  |
| GOTERM_MF_FAT        | translation factor activity, nucleic acid binding                        | 4     | 1.9  | 4.4             | 2.70E-02 | 7.20E-01  |
| GOTERM_BP_FAT        | nuclear export                                                           | 4     | 1.9  | 6.1             | 2.70E-02 | 8.90E-01  |
| MINT                 | 805245 FYN oncogene related to SRC, FGR, YES                             | 3     | 1.5  | 11.5            | 2.70E-02 | 1.00E+00  |
| GOTERM_CC_FAT        | trans-Solgi network transport vesicle                                    | 3     | 1.5  | 11.6            | 2.70E-02 | 5.80E-01  |
| GOTERM_BP_FAT        | macromolecular complex assembly                                          | 14    | 6.8  | 1.9             | 2.80E-02 | 8.80E-01  |
| GOTERM_BP_FAT        | phospholipid biosynthetic process                                        | 4     | 1.9  | 3.5             | 2.80E-02 | 8.80E-01  |
| GOTERM_BP_FAT        | carbohydrate biosynthetic process                                        | 5     | 2.4  | 4.3             | 2.90E-02 | 8.60E-01  |
| SMART                | SNAPE                                                                    | 3     | 1.5  | 11.1            | 2.90E-02 | 9.50E-01  |
| SP_PIR_KEYWORDS      | Aminopeptidase                                                           | 3     | 1.5  | 11.2            | 2.90E-02 | 4.50E-01  |
| SP_PIR_KEYWORDS      | Signal anchor                                                            | 10    | 4.8  | 2.3             | 3.00E-02 | 4.40E-01  |
| REACTOME_INTERACTION | nerve growth factor (beta polypeptide)                                   | 4     | 1.9  | 5.6             | 3.00E-02 | 1.00E+00  |
| GOTERM_BP_FAT        | superoxide metabolic process                                             | 3     | 1.5  | 11              | 3.00E-02 | 8.60E-01  |
| UCSC_TBBS            | CDP                                                                      | 117   | 56.8 | 1.1             | 3.10E-02 | 3.70E-01  |
| UCSC_TBBS            | AKOAP1                                                                   | 87    | 42.2 | 1.2             | 3.10E-02 | 3.90E-01  |
| UCSC_TBBS            | PIRX1                                                                    | 112   | 54.4 | 1.1             | 3.20E-02 | 3.80E-01  |
| UCSC_TBBS            | RF1                                                                      | 54    | 26.2 | 1.3             | 3.30E-02 | 3.40E-01  |
| GOTERM_MF_FAT        | identical protein binding                                                | 14    | 6.8  | 1.9             | 3.40E-02 | 7.70E-01  |
| INTERPRO             | Target SNAPE coiled-coil region                                          | 3     | 1.5  | 10.2            | 3.40E-02 | 9.80E-01  |
| UCSC_TBBS            | MYB                                                                      | 82    | 39.7 | 1.1             | 3.50E-02 | 3.30E-01  |
| UCSC_TBBS            | MYB                                                                      | 90    | 43.7 | 1.2             | 3.50E-02 | 3.40E-01  |
| GOTERM_CC_FAT        | perinuclear region of cytoplasm                                          | 8     | 3.9  | 2.6             | 3.50E-02 | 6.00E-01  |
| GOTERM_CC_FAT        | mitochondrial matrix                                                     | 7     | 3.4  | 2.9             | 3.50E-02 | 6.40E-01  |
| GOTERM_CC_FAT        | mitochondrial lumen                                                      | 7     | 3.4  | 2.9             | 3.50E-02 | 6.40E-01  |
| BIND                 | heterogeneous nuclear ribonucleoprotein U (scaffold attachment factor A) | 4     | 1.9  | 5.5             | 3.50E-02 | 1.00E+00  |
| UCSC_TBBS            | PAX6                                                                     | 106   | 51.5 | 1.1             | 3.60E-02 | 3.10E-01  |
| UCSC_TBBS            | MEIS1/HRX9A                                                              | 96    | 48.1 | 1.2             | 3.60E-02 | 3.00E-01  |
| GOTERM_BP_FAT        | activation of protein kinase activity                                    | 5     | 2.4  | 4               | 3.60E-02 | 8.90E-01  |
| GOTERM_CC_FAT        | intracellular organelle lumen                                            | 26    | 13.6 | 1.5             | 3.70E-02 | 5.90E-01  |
| GOTERM_BP_FAT        | actin cytoskeleton organization                                          | 7     | 3.4  | 2.8             | 3.70E-02 | 8.90E-01  |
| REACTOME_INTERACTION | vesicle-associated membrane protein 2 (synaptobrevin 2)                  | 3     | 1.5  | 9.4             | 3.70E-02 | 1.00E+00  |
| GOTERM_MF_FAT        | RNA binding                                                              | 15    | 7.3  | 1.8             | 3.80E-02 | 7.70E-01  |
| GOTERM_BP_FAT        | ligand modification                                                      | 4     | 1.9  | 5.3             | 3.90E-02 | 9.00E-01  |
| GOTERM_MF_FAT        | single-stranded RNA binding                                              | 3     | 1.5  | 9.6             | 3.90E-02 | 7.40E-01  |
| BIND                 | growth factor receptor bound protein 2                                   | 7     | 3.4  | 2.7             | 4.00E-02 | 1.00E+00  |
| MINT                 | 802764 HLA-B associated transcript 2                                     | 3     | 1.5  | 9.3             | 4.00E-02 | 1.00E+00  |
| UCSC_TBBS            | IFIH1                                                                    | 88    | 43.2 | 1.2             | 4.10E-02 | 3.20E-01  |
| GOTERM_BP_FAT        | cellular macromolecular complex subunit organization                     | 8     | 4.4  | 2.3             | 4.10E-02 | 9.00E-01  |
| PANTHER_FAMILY       | PTH11258-SH3/MU1/TIPIE DOMAIN                                            | 2     | 1    | 47.9            | 4.10E-02 | 1.00E+00  |
| PANTHER_FAMILY       | PTH11258-p25KILG/ADENYLATE SYNTHETASE                                    | 2     | 1    | 47.9            | 4.10E-02 | 1.00E+00  |
| UCSC_TBBS            | YY1                                                                      | 134   | 65   | 1.1             | 4.20E-02 | 3.10E-01  |
| INTERPRO             | Heavy metal associated, conserved site                                   | 2     | 1    | 45.8            | 4.30E-02 | 9.80E-01  |
| INTERPRO             | 2'-5'-oligoadenylate synthetase 1, domain 2/C-terminal                   | 2     | 1    | 45.8            | 4.30E-02 | 9.80E-01  |
| INTERPRO             | 2'-5'-oligoadenylate synthetase, conserved site                          | 2     | 1    | 45.8            | 4.30E-02 | 9.80E-01  |
| INTERPRO             | Heavy metal transport/detoxification protein                             | 2     | 1    | 45.8            | 4.30E-02 | 9.80E-01  |
| SP_PIR_KEYWORDS      | ribosomal protein                                                        | 6     | 2.9  | 3.1             | 4.40E-02 | 5.60E-01  |
| GOTERM_BP_FAT        | actin filament organization                                              | 4     | 1.9  | 5.1             | 4.40E-02 | 9.00E-01  |
| GOTERM_MF_FAT        | structural constituent of ribosome                                       | 6     | 2.9  | 3.1             | 4.50E-02 | 7.70E-01  |
| GOTERM_BP_FAT        | positive regulation of defense response                                  | 4     | 1.9  | 8               | 4.50E-02 | 9.00E-01  |
| BLOCKS               | IPRO06117                                                                | 3     | 1    | 43.1            | 4.50E-02 | 9.70E-01  |
| UCSC_TBBS            | CART1                                                                    | 85    | 45.1 | 1.2             | 4.60E-02 | 3.30E-01  |
| UCSC_TBBS            | SOCS                                                                     | 94    | 45.6 | 1.2             | 4.70E-02 | 3.20E-01  |
| GOTERM_CC_FAT        | granule lumen                                                            | 26    | 13.6 | 1.4             | 4.70E-02 | 6.10E-01  |
| GOTERM_CC_FAT        | Solgi apparatus                                                          | 16    | 7.8  | 1.7             | 4.70E-02 | 6.30E-01  |
| MINT                 | 518071 serpin peptidase inhibitor, clade B (ovalbumin), member 9         | 2     | 1    | 85              | 4.70E-02 | 1.00E+00  |
| SP_PIR_KEYWORDS      | hydrolase                                                                | 24    | 11.7 | 1.5             | 4.80E-02 | 5.60E-01  |
| GOTERM_BP_FAT        | actin filament-based process                                             | 7     | 3.4  | 2.7             | 4.80E-02 | 9.10E-01  |
| REACTOME_PATHWAY     | REACT_11061: Signaling by NGF                                            | 6     | 2.9  | 2.8             | 4.90E-02 | 8.40E-01  |



**Table S9. List of Genes with Greater Than Two-Fold Upregulation or Downregulation**

| GeneSymbol | entrez GeneID | nuID                | logFC <sup>a</sup> | Aproximate FC <sup>a,b</sup> | t <sup>c</sup> | P.Value | adj.P.Val | B <sup>d</sup> | Control |        | MRX3    | Male Control |        | Female Control |        |
|------------|---------------|---------------------|--------------------|------------------------------|----------------|---------|-----------|----------------|---------|--------|---------|--------------|--------|----------------|--------|
|            |               |                     |                    |                              |                |         |           |                | Average | SD     | Average | Average      | SD     | Average        | SD     |
| UCHL1      | 7345          | lpJcOd7qKh.nj9V31c  | -2.1320            | 0.2281                       | -2.5152        | 0.0273  | 0.8693    | -3.3937        | 9.0452  | 1.3196 | 6.9132  | 9.7296       | 1.3235 | 8.4976         | 1.1515 |
| LOC644936  | 644936        | KTqOT7xKC1fidcAIF0  | -1.7837            | 0.2904                       | -2.2008        | 0.0482  | 0.8951    | -3.7335        | 11.8459 | 1.0280 | 10.0622 | 12.4354      | 0.2374 | 11.3743        | 1.2024 |
| TUBB2B     | 347733        | ircfyu5nq3eud9HvI4  | -1.3955            | 0.3801                       | -1.7390        | 0.1078  | 0.9140    | -4.2115        | 11.0573 | 1.2474 | 9.6618  | 10.7713      | 1.5692 | 11.2861        | 1.0574 |
| PSAT1      | 29968         | Ek9TyQj_xVdVLzFXc   | -1.1607            | 0.4473                       | -3.0914        | 0.0094  | 0.8117    | -2.7712        | 9.6895  | 0.4692 | 8.5288  | 9.4124       | 0.5517 | 9.9112         | 0.2716 |
| SERPINB1   | 1992          | QZcruSjd.BLJcNje3o  | -1.1277            | 0.4576                       | -2.3850        | 0.0346  | 0.8708    | -3.5350        | 8.4800  | 0.7328 | 7.3522  | 8.0230       | 0.8031 | 8.8455         | 0.4630 |
| HLA-K      | 649853        | KGhIVCGTOHRRnt3htTg | 2.8822             | 7.3729                       | 1.8053         | 0.0964  | 0.9140    | -4.1454        | 9.4482  | 2.4895 | 12.3304 | 7.9637       | 2.2864 | 10.6357        | 2.1233 |
| RPS4Y1     | 6192          | QEPD_7OuProlBdrbvo  | 2.8364             | 7.1423                       | 1.6134         | 0.1329  | 0.9196    | -4.3334        | 9.2278  | 2.7409 | 12.0642 | 12.1141      | 0.1818 | 6.9188         | 0.0743 |
| MMP7       | 4316          | rkHTgfpT3_rOot13JU  | 1.9585             | 3.8865                       | 3.1580         | 0.0083  | 0.8014    | -2.7007        | 8.0686  | 0.8387 | 10.0271 | 7.5380       | 0.9769 | 8.4931         | 0.4293 |
| EIF1AY     | 9086          | WeK0vcS_o6U00FCCI   | 1.9434             | 3.8461                       | 1.6133         | 0.1329  | 0.9196    | -4.3335        | 8.2765  | 1.8767 | 10.2199 | 10.2499      | 0.2018 | 6.6978         | 0.0610 |
| MMP7       | 4316          | 3nR9jjigZ6GjrJLcqM  | 1.8793             | 3.6791                       | 3.2856         | 0.0066  | 0.7949    | -2.5669        | 7.8442  | 0.7728 | 9.7236  | 7.4106       | 0.9561 | 8.1911         | 0.4127 |
| CLU1OS     | 574016        | Xotrr84O65TeqB4QU   | 1.6035             | 3.0387                       | 1.9241         | 0.0786  | 0.9140    | -4.0245        | 8.2585  | 1.2942 | 9.8619  | 8.8066       | 1.4123 | 7.8200         | 1.1458 |
| MAL        | 4118          | 6dFQSN_UitTrolYwV4  | 1.4210             | 2.6777                       | 2.7744         | 0.0169  | 0.8425    | -3.1119        | 8.9930  | 0.7711 | 10.4140 | 9.3313       | 0.9388 | 8.7223         | 0.5677 |
| FXYD2      | 486           | T6KSVPRReqA4er7Y6Gs | 1.4124             | 2.6617                       | 1.8912         | 0.0832  | 0.9140    | -4.0584        | 7.7453  | 0.9319 | 9.1576  | 7.1788       | 0.6934 | 8.1984         | 0.8938 |
| PRRX1      | 5396          | nj96N8JS_0uitdKnk   | 1.4004             | 2.6397                       | 4.6636         | 0.0006  | 0.6814    | -1.2744        | 6.9560  | 0.2485 | 8.3563  | 6.8878       | 0.2091 | 7.0105         | 0.2870 |
| IL17RB     | 55540         | QnnX7JUVOJCIxwKfU   | 1.3697             | 2.5841                       | 2.2202         | 0.0466  | 0.8951    | -3.7127        | 8.5868  | 0.8203 | 9.9564  | 7.9616       | 0.7110 | 9.0869         | 0.5127 |
| GSTT1      | 2952          | Euj6F0V_RbXSS1ECQ   | 1.3655             | 2.5766                       | 2.7588         | 0.0174  | 0.8425    | -3.1288        | 7.8014  | 0.7668 | 9.1669  | 7.3379       | 0.9794 | 8.1722         | 0.2642 |
| FAM38B     | 63895         | Zgl5e7_Xe6pW5H16lg  | 1.2859             | 2.4384                       | 2.9769         | 0.0116  | 0.8359    | -2.8935        | 7.6843  | 0.6675 | 8.9702  | 7.7363       | 0.6483 | 7.6427         | 0.7556 |
| KDM5D      | 8284          | WN_KCVC5sX8_VUUV0   | 1.2377             | 2.3583                       | 2.1898         | 0.0492  | 0.8951    | -3.7452        | 7.3999  | 0.8764 | 8.6377  | 8.2827       | 0.4192 | 6.6937         | 0.0406 |
| MSX1       | 4487          | QrVSSD4S_BlnIpTt14  | 1.2326             | 2.3499                       | 2.2357         | 0.0453  | 0.8951    | -3.6962        | 8.1052  | 0.8035 | 9.3378  | 7.4586       | 0.3813 | 8.6225         | 0.6554 |
| UGT2B7     | 7364          | WwEX2r5JUyRevUsUc   | 1.2223             | 2.3331                       | 1.4989         | 0.1600  | 0.9331    | -4.4404        | 8.4412  | 1.2559 | 9.6634  | 8.7499       | 1.1540 | 8.1941         | 1.4087 |
| TMEM51     | 55092         | Qc26LXge6sgBGF6f7I  | 1.2210             | 2.3310                       | 6.0922         | 0.0001  | 0.4734    | -0.2708        | 7.6048  | 0.2895 | 8.8257  | 7.6798       | 0.2208 | 7.5447         | 0.3478 |
| UGT2B17    | 7367          | uSUBX5cKA6CL_5Ineg  | 1.2192             | 2.3282                       | 2.0890         | 0.0589  | 0.9061    | -3.8525        | 7.8879  | 0.9027 | 9.1071  | 8.1341       | 0.9415 | 7.6909         | 0.9250 |
| UGT2B7     | 7364          | WicBF9q_SVGF0Xr1LE  | 1.2038             | 2.3034                       | 1.5072         | 0.1578  | 0.9331    | -4.4328        | 8.3383  | 1.2311 | 9.5421  | 8.5968       | 1.0993 | 8.1315         | 1.4159 |
| ASCL1      | 429           | BddMirNCKUJvsSRQ4   | 1.2005             | 2.2981                       | 2.0356         | 0.0647  | 0.9101    | -3.9086        | 7.7095  | 0.6469 | 8.9100  | 7.8551       | 0.7657 | 7.5931         | 0.5991 |
| HOXB2      | 3212          | ZpbcegA2Jd1RXS2Tlc  | 1.1934             | 2.2869                       | 4.8795         | 0.0004  | 0.6814    | -1.1011        | 7.1833  | 0.3724 | 8.3767  | 7.0380       | 0.4555 | 7.2996         | 0.2894 |
| CXCR4      | 7852          | ryQLhIpeLnUsIFk3o   | 1.1709             | 2.2515                       | 2.1309         | 0.0547  | 0.9061    | -3.8080        | 8.1929  | 0.7911 | 9.3637  | 8.1554       | 0.9579 | 8.2228         | 0.7490 |
| OAS1       | 4938          | HdefXV5T01eVd1OCfg  | 1.1060             | 2.1525                       | 2.0429         | 0.0639  | 0.9070    | -3.9009        | 8.8313  | 0.8309 | 9.9373  | 8.2417       | 0.7590 | 9.3030         | 0.5681 |
| OXTR       | 5021          | IKl6Ke4iOKThxwq_qs  | 1.0942             | 2.1349                       | 3.3755         | 0.0056  | 0.7804    | -2.4737        | 8.5197  | 0.4855 | 9.6139  | 8.2223       | 0.5586 | 8.7576         | 0.2797 |
| CR2        | 1380          | BQof3gI0f0I5eCUpTo  | 1.0772             | 2.1099                       | 3.3615         | 0.0057  | 0.7804    | -2.4882        | 9.0340  | 0.4932 | 10.1112 | 9.3255       | 0.4454 | 8.8008         | 0.4299 |
| TGM5       | 9333          | Ed2iSvih7ueHugoLpc  | 1.0748             | 2.1064                       | 3.8937         | 0.0022  | 0.7414    | -1.9587        | 7.5378  | 0.4227 | 8.6126  | 7.6512       | 0.4169 | 7.4472         | 0.4515 |
| B3GNT2     | 10678         | 9pXinsUzR4UrU3cVt4  | 1.0621             | 2.0879                       | 3.5673         | 0.0039  | 0.7620    | -2.2784        | 8.4860  | 0.4337 | 9.5480  | 8.6191       | 0.3629 | 8.3795         | 0.4955 |
| MAL        | 4118          | xH4ngB6UjrvB6WVR_Wk | 1.0587             | 2.0830                       | 2.6838         | 0.0200  | 0.8425    | -3.2102        | 7.7242  | 0.5890 | 8.7828  | 7.9627       | 0.7146 | 7.5334         | 0.4565 |
| HAVCR2     | 84868         | fhrMp_N7fnz75VeZck  | 1.0419             | 2.0589                       | 3.9573         | 0.0019  | 0.7414    | -1.8983        | 8.6321  | 0.3865 | 9.6739  | 8.8645       | 0.3823 | 8.4461         | 0.3032 |
| CKLF       | 51192         | rSWAMATZV959LuApRs  | 1.0187             | 2.0261                       | 3.5496         | 0.0040  | 0.7620    | -2.2963        | 8.5509  | 0.4126 | 9.5696  | 8.6313       | 0.5485 | 8.4865         | 0.3212 |
| S100A4     | 6275          | qNeHintOm5XeIClejuM | 1.0112             | 2.0156                       | 2.0324         | 0.0650  | 0.9101    | -3.9120        | 9.2362  | 0.6767 | 10.2475 | 9.0621       | 0.9724 | 9.3755         | 0.3899 |

<sup>a</sup>FC: fold change

<sup>b</sup>relative to expression in controls

<sup>c</sup>moderated t-statistic

<sup>d</sup>B statistic

**Table S10. Functional Annotation of 35 Two-Fold Upregulated or Downregulated Genes**

| Category        | Term                                                  | Count | %    | Fold Enrichment | P-Value  | Benjamini |
|-----------------|-------------------------------------------------------|-------|------|-----------------|----------|-----------|
| GOTERM_BP_FAT   | neuron differentiation                                | 5     | 15.6 | 6.4             | 5.90E-03 | 9.50E-01  |
| GOTERM_BP_FAT   | cell morphogenesis involved in differentiation        | 4     | 12.5 | 9.2             | 7.90E-03 | 8.70E-01  |
| KEGG_PATHWAY    | Metabolism of xenobiotics by cytochrome P450          | 3     | 9.4  | 18.2            | 9.80E-03 | 2.70E-01  |
| KEGG_PATHWAY    | Drug metabolism                                       | 3     | 9.4  | 17.6            | 1.00E-02 | 1.50E-01  |
| SP_PIR_KEYWORDS | microsome                                             | 3     | 9.4  | 18.1            | 1.10E-02 | 7.10E-01  |
| SP_PIR_KEYWORDS | transferase                                           | 7     | 21.9 | 3.2             | 1.60E-02 | 5.90E-01  |
| PANTHER_FAMILY  | PTHR11926~GLUCOSYL/GLUCURONOSYL TRANSFERASES          | 2     | 6.2  | 103.1           | 1.80E-02 | 3.50E-01  |
| GOTERM_BP_FAT   | neuron development                                    | 4     | 12.5 | 6.7             | 1.90E-02 | 9.60E-01  |
| INTERPRO        | UDP-glucuronosyl/UDP-glucosyltransferase              | 2     | 6.2  | 94.9            | 2.00E-02 | 8.10E-01  |
| GOTERM_BP_FAT   | cell morphogenesis                                    | 4     | 12.5 | 6.3             | 2.20E-02 | 9.40E-01  |
| PANTHER_FAMILY  | PTHR19418~HOMEBOX PROTEIN                             | 3     | 9.4  | 12              | 2.40E-02 | 2.40E-01  |
| GOTERM_BP_FAT   | forebrain development                                 | 3     | 9.4  | 11.1            | 2.70E-02 | 9.40E-01  |
| BLOCKS          | IPB002213                                             | 2     | 6.2  | 69.4            | 2.70E-02 | 5.00E-01  |
| GOTERM_BP_FAT   | cellular component morphogenesis                      | 4     | 12.5 | 5.7             | 2.90E-02 | 9.20E-01  |
| PIR_SUPERFAMILY | PIRSF005678:glucuronosyltransferase                   | 2     | 6.2  | 63.2            | 2.90E-02 | 5.00E-01  |
| SMART           | HOX                                                   | 3     | 9.4  | 9.7             | 3.10E-02 | 3.60E-01  |
| UP_SEQ_FEATURE  | DNA-binding region:Homeobox                           | 3     | 9.4  | 10.1            | 3.30E-02 | 9.70E-01  |
| GOTERM_BP_FAT   | cell proliferation                                    | 4     | 12.5 | 5.2             | 3.70E-02 | 9.40E-01  |
| GOTERM_BP_FAT   | eating behavior                                       | 2     | 6.2  | 49              | 3.80E-02 | 9.20E-01  |
| UP_SEQ_FEATURE  | domain:MARVEL                                         | 2     | 6.2  | 49              | 3.90E-02 | 8.70E-01  |
| SP_PIR_KEYWORDS | glycosyltransferase                                   | 3     | 9.4  | 9               | 4.10E-02 | 7.90E-01  |
| GOTERM_MF_FAT   | glucuronosyltransferase activity                      | 2     | 6.2  | 45.4            | 4.20E-02 | 9.90E-01  |
| GOTERM_BP_FAT   | axonogenesis                                          | 3     | 9.4  | 8.8             | 4.20E-02 | 9.10E-01  |
| KEGG_PATHWAY    | Ascorbate and aldarate metabolism                     | 2     | 6.2  | 42.7            | 4.30E-02 | 3.70E-01  |
| GOTERM_BP_FAT   | behavior                                              | 4     | 12.5 | 4.8             | 4.40E-02 | 9.00E-01  |
| KEGG_PATHWAY    | Pentose and glucuronate interconversions              | 2     | 6.2  | 40.4            | 4.50E-02 | 3.10E-01  |
| GOTERM_BP_FAT   | cell motion                                           | 4     | 12.5 | 4.7             | 4.50E-02 | 8.90E-01  |
| GOTERM_CC_FAT   | integral to membrane                                  | 13    | 40.6 | 1.6             | 4.70E-02 | 9.60E-01  |
| UP_SEQ_FEATURE  | transmembrane region                                  | 13    | 40.6 | 1.7             | 4.70E-02 | 8.10E-01  |
| GOTERM_CC_FAT   | microsome                                             | 3     | 9.4  | 8.1             | 4.80E-02 | 8.00E-01  |
| GOTERM_BP_FAT   | cell morphogenesis involved in neuron differentiation | 3     | 9.4  | 8.1             | 4.90E-02 | 8.80E-01  |
| SP_PIR_KEYWORDS | transmembrane                                         | 13    | 40.6 | 1.7             | 4.90E-02 | 7.50E-01  |

**Table S11. Clinical Description of Individuals with Missense Variation in *HCFC1***

| <b>FAMILY</b> | <b>VARIANT</b>              | <b>CLINICAL INFORMATION</b>                                                                                                                                                                                                                                                                                                                                                                                                                                                                                                                                                                                                                                                                                                                                                                                                                                                                                                                                                                                                                    |
|---------------|-----------------------------|------------------------------------------------------------------------------------------------------------------------------------------------------------------------------------------------------------------------------------------------------------------------------------------------------------------------------------------------------------------------------------------------------------------------------------------------------------------------------------------------------------------------------------------------------------------------------------------------------------------------------------------------------------------------------------------------------------------------------------------------------------------------------------------------------------------------------------------------------------------------------------------------------------------------------------------------------------------------------------------------------------------------------------------------|
| D144          | X:1528881908C>T;<br>p.S225N | The index individual was born after an uneventful pregnancy at term to healthy and unrelated parents. He had mild intellectual disability and attended a school for special needs. On examination at the age of 17 years, he had behavioral problems including anxiety disorder and a tendency to compulsive behavior, but was otherwise healthy. His younger brother also had mild intellectual disability. At the age of 6 years, high-grade hyperopia was detected, and he attended a school for children with visual problems. On examination at the age of 9 years, deficits in fine motor skills were more pronounced than his verbal deficiencies. Body measurements were normal, and he had no dysmorphic signs or other additional health problems (see <b>Supplementary Fig. 11</b> )                                                                                                                                                                                                                                                |
| D82           | X:152870346G>A;<br>p.A1756V | The index individual was born after an uneventful pregnancy to healthy and non-consanguineous parents. Psychomotor development was delayed. On examination at the age of 11 years, he had mild intellectual disability. Body measurements were normal, and, apart from asthma, he had no other health problems. Clinical information for other affected of the family was unavailable.                                                                                                                                                                                                                                                                                                                                                                                                                                                                                                                                                                                                                                                         |
| D147          | X:152875279C>T;<br>p.G876S  | The individual was born to non-consanguineous healthy Turkish parents after an uneventful pregnancy at 37 weeks of gestation. His birth measurements were normal (weight: 3200 g, length: 49 cm, OFC: 35 cm). Breast feeding was not possible due to muscular hypotonia. He learned to sit at the age of 10 months and was able to walk without support at the age of 2 years. He spoke his first words at the same age. His childhood was complicated by frequent infections. An inguinal hernia and a cryptorchidism were surgically corrected. Seizures were successfully treated with carbamazepine. He visited a school for the mentally disabled. At the age of 8 9/12 years he had normal measurements for height and weight [height: 130 cm (10-25th centile; weight: 36 kg (90-97th centile)], but he presented with macrocephaly [OFC: 56 cm (>97th centile)]. He presented with macrostomia with a full and everted lower lip, a low-set posterior hairline, large and simple modelled ears, brachytelephalangy and hypertrichosis. |
